# Supplementary material for: Self-assembly of MAPbBr3/Pb-MOF heterostructures with enhanced photocatalytic CO2 reduction performance and stability
Source: Royal Society of Chemistry journal article supplement (doi:10.1039/d3tc03362g), 2023-01-01
Supplement: d3tc03362g1.pdf [file d3tc03362g1.pdf]

## Supporting Information

### **Self-assembly of MAPbBr<sub>3</sub>/Pb-MOF heterostructure with enhanced photocatalytic CO<sub>2</sub> reduction performance and stability**

Dan-Yang, Zhou, Wan-Ting, Su, Xin-Yu Li, Tao Hong, Guang-Yu Pan, Mei-Ling Xu, Fu-Tian Liu\* and Kui Li\*

School of Materials Science and Engineering, University of Jinan, Jinan, 250022, PR China.

Email: mse\_liuft@ujn.edu.cn (Fu-Tian Liu), mse\_lik@ujn.edu.cn (Kui Li).

## 1. Experimental Section

### 1.1 Materials

Methylammonium bromide (MABr, 99.5%, CAS 6876-37-5), Lead bromide ( $\text{PbBr}_2$ , 99.0%, CAS 10031-22-8), p-Phthalic acid ( $\text{C}_8\text{H}_6\text{O}_4$ , 99%, CAS 100-21-0) were purchased from Shanghai Macklin Biochemical Co., Ltd, Isopropyl alcohol (99.5%, CAS 67-63-0) were purchased from Tianjin Fuyu Fine Chemical Co., Ltd. All chemicals were used without further purification. All of the reagents and solvents were commercially available and could be used without further purification.

### 1.2 Synthesis of $\text{MAPbBr}_3$

$\text{MAPbBr}_3$  nanocrystals were prepared by high-energy ball milling. MABr and  $\text{PbBr}_2$  were weighed in a molar ratio of 1 : 1, and then placed in 3 mL of isopropyl alcohol (IPA) to disperse uniformly by ultrasonic. As a grinding agent, IPA can achieve sufficient grinding. It was then transferred to a 25 mL agate grinding jar containing 5 agate grinding balls, and ground for 120 min at 600 rpm in a glove box under  $\text{N}_2$  atmosphere. After ball milling, the orange-yellow perovskite paste was centrifuged and washed with IPA for more than three times to remove unreacted substances, followed by vacuum drying at 60 °C to obtain orange-yellow  $\text{MAPbBr}_3$  powder.

### 1.3 Synthesis of *Pb-MOF*

Typically, 1 mmol of  $\text{Pb}(\text{CH}_3\text{COO})_2 \cdot 3\text{H}_2\text{O}$  and 2 mmol of p-Phthalic acid (PTA) were dissolved in 20 mL of IPA and stirred for 1 h. Then, the mixture was moved to a 50 mL Teflon-lined autoclave and heated at 100 °C for 24 h. After centrifugation, washed with IPA for more than three times and placed in a vacuum drying box to dry at 60 °C overnight, the obtained white powder was recorded as *Pb-MOF*.

### 1.4 Synthesis of $\text{MAPbBr}_3/\text{Pb-MOF}$

100mg of pre-prepared  $\text{MAPbBr}_3$  powder was dispersed in 20 mL of IPA, and PTA

was added to the same four solutions according to different molar ratios, and recorded as MP0.05, MP0.5, MP1, MP2 (MAPbBr<sub>3</sub> : PTA = 1:0.05,1:0.5,1:1,1:2), which were recorded as MP0.05, MP0.5, MP1, MP2. The solution was transferred to a 50ml Teflon-lined reaction kettle, kept at 100 °C for 24 h, washed with IPA for more than three times after centrifugation to remove unreacted substances, and dried at 60 °C overnight.

### *1.5 Materials Characterization*

The phase composition of samples was obtained by X-ray diffraction (XRD, D8 Advance) equipped with Cu K $\alpha$  radiation ( $\lambda = 1.54060 \text{ \AA}$ ). Fourier transform infrared spectroscopy (FT-IR) was collected on a Thermo Scientific Nicolet iS10 spectrometer. The morphologies of samples were observed on transmission electron microscopy (TEM, JEM-2100Plus). The X-ray photoelectron spectroscopy (XPS) spectra were analyzed by a Thermo Fisher Scientific corporation Escalab 250Xi instrument. N<sub>2</sub> adsorption/desorption isotherms were examined with Brunauer-Emmett-Teller (BET). UV-vis DRS spectra was measured with Shimadzu UV-3600. Steady photoluminescence (PL) emission spectra were tested by luminescence spectrophotometer (QM-400, PTI) with 450 nm excitation wavelength. Transient time resolved PL decay measurements were obtained using a FLS1000 under the excitation of 450 nm. The active species were analyzed by using electron spin resonance (ESR) test (Bruker ESR A-300).

### *1.6 Photocatalytic Experiments*

The photocatalytic CO<sub>2</sub> reduction performance was measured by a gas-solid test system under the visible light of 300W Xe lamp. The powder sample of 20 mg was weighed and placed on sample rack in a quartz reactor filled with CO<sub>2</sub> and water vapor. 0.5 ml of deionized water is placed under the sample in the reactor to avoid direct contact with the sample. Subsequently, the sealed reactor is heated at 60 °C for 30 minutes to ensure that the deionized water becomes water vapor. The water vapor participated in the chemical reaction as a proton source. 1 ml of gas product is extracted

with a syringe every hour and analyzed by gas chromatography (GC-7900, CEAULight, China) with a TCD and FID detector.

### *1.7 Electrochemical measurements*

Photoelectrochemical characterizations were proceeded in Tetrabutylammonium hexafluorophosphate (TBAPF<sub>6</sub>) (0.1 M) solution with a standard three-electrode system on the electrochemical station (SP-150, Bio-Logic). The carbon cloth coated with catalyst, Pt net and saturated Ag/AgCl were served as working electrode, counter electrode and reference electrode, respectively. Typically, a slurry of 4 mg of sample and 1 ml of ethanol were used to make the working electrode. The electrochemical impedance spectroscopy (EIS) was recorded from 0.01 Hz to 100 kHz with a sinusoidal ac perturbation of 10 mV. The impedance potential model was employed to collect the Mott-Schottky plots with the frequency of 500, 1000 and 2000 Hz. I-t curves were recorded using 300 W Xe lamp with a 420 nm cutoff filter.

## 2. Supporting Figures

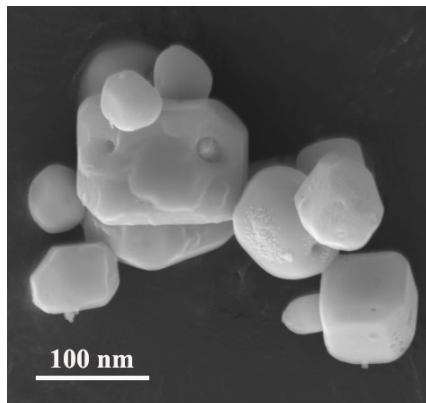

Fig. S1 SEM image of MAPbBr<sub>3</sub>.

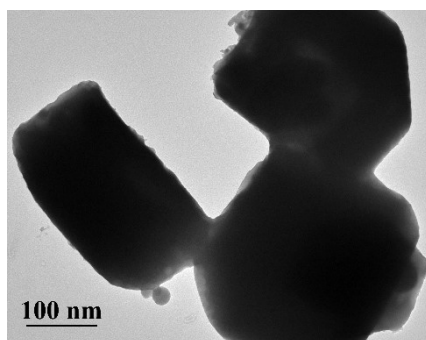

Fig. S2 TEM image of MP0.05.

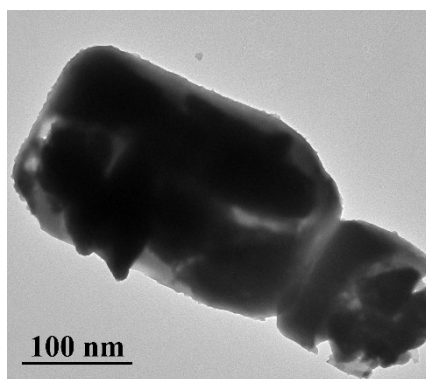

Fig. S3 TEM image of MP2.

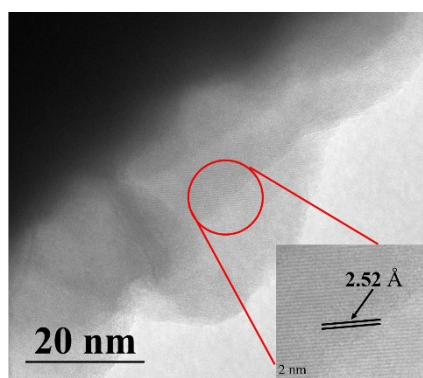

Fig. S4 TEM image of Pb-MOF (inset: HRTEM image of Pb-MOF).

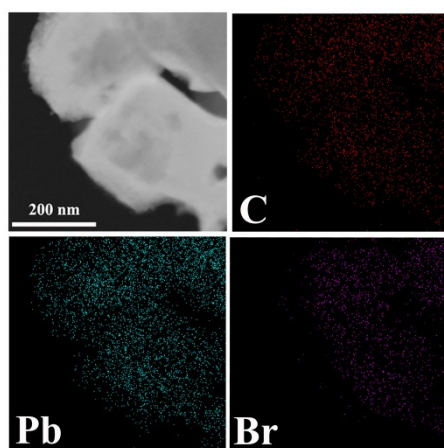

Fig. S5 The corresponding EDX mapping images of MP0.5.

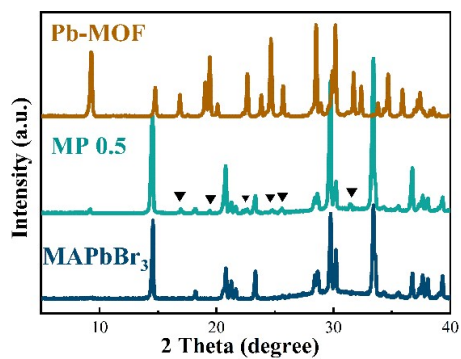

Fig. S6 XRD patterns of MAPbBr<sub>3</sub>, Pb-MOF and MP 0.5.

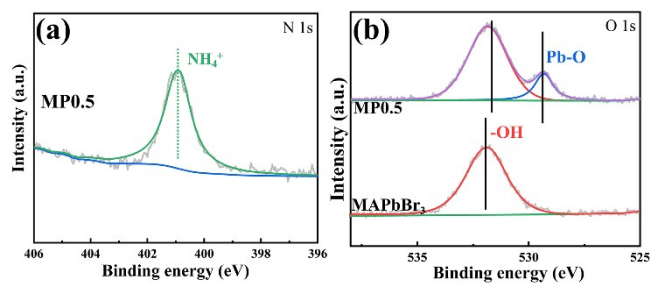

Fig. S7 The high resolution XPS spectra: (a) N 1s of MP0.5, (b) O 1s of MAPbBr<sub>3</sub> and MP0.5.

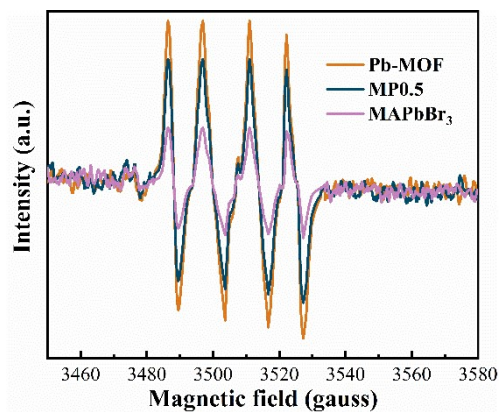

Fig. S8 EPR detection of  $\cdot\text{O}_2^-$  under light irradiation of MAPbBr<sub>3</sub>, Pb-MOF and MP0.5.

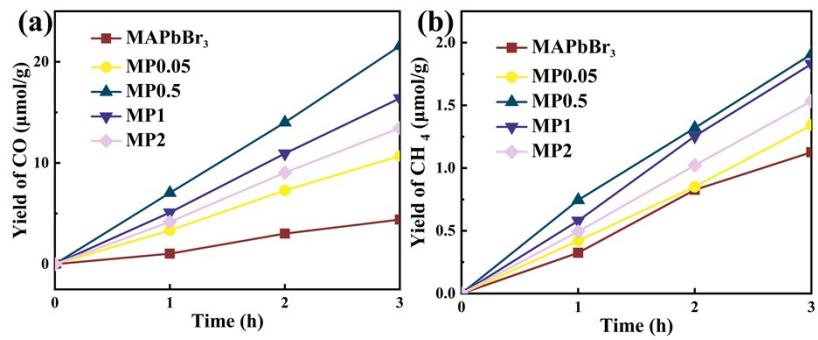

Fig. S9 Photocatalytic reduction of CO<sub>2</sub> products within 3h



### 3. Supporting Tables

Table S1. The detailed transient fluorescence properties of MAPbBr<sub>3</sub>, Pb-MOF and MP samples.

| Samples             | A <sub>1</sub> (%) | τ <sub>1</sub> (ns) | A <sub>2</sub> (%) | τ <sub>2</sub> (ns) | A <sub>3</sub> (%) | τ <sub>3</sub> (ns) | Average lifetime τ (ns) |
|---------------------|--------------------|---------------------|--------------------|---------------------|--------------------|---------------------|-------------------------|
| Pb-MOF              | 71.8               | 2.59                | 27.5               | 2.59                | 0.7                | 12.8                | 2.94                    |
| MAPbBr <sub>3</sub> | 44.3               | 1.79                | 31.8               | 1.79                | 23.9               | 2.05                | 1.86                    |
| MP0.05              | 78.8               | 1.64                | 0.1                | 17                  | 21.1               | 0.9                 | 1.72                    |
| MP0.5               | 0.1                | 6.54                | 56.1               | 1.37                | 43.8               | 1.37                | 1.39                    |
| MP2                 | 0.4                | 4.2                 | 67                 | 1.35                | 32.6               | 1.79                | 1.55                    |

Table S2 Specific surface area data of samples

| Sample              | S <sub>BET</sub> (m <sup>2</sup> g <sup>-1</sup> ) | S <sub>Langmuir</sub> (m <sup>2</sup> g <sup>-1</sup> ) |
|---------------------|----------------------------------------------------|---------------------------------------------------------|
| MAPbBr <sub>3</sub> | 21.23                                              | 81.26                                                   |
| MP0.5               | 65.47                                              | 247.19                                                  |
| Pb-MOF              | 1769                                               | 4501                                                    |

Table S3 Resistance value (Rs and Rc) of MAPbBr<sub>3</sub>, Pb-MOF and MP0.5 samples.

| Sample              | Rs (Ω) | Rc (Ω) |
|---------------------|--------|--------|
| MAPbBr <sub>3</sub> | 117    | 2994   |
| MP0.5               | 2.727  | 542.8  |
| Pb-MOF              | 125.6  | 3708   |

Table S4 The yield of CO and CH<sub>4</sub> productions and the selectivity of CO for photocatalytic conversion of CO<sub>2</sub> over different samples MP0.5 samples.

| Sample              | Yield of production                   |                                       | Charge selectivity for<br>CO (%) |
|---------------------|---------------------------------------|---------------------------------------|----------------------------------|
|                     | CO                                    | CH <sub>4</sub>                       |                                  |
|                     | ( $\mu\text{mol}\cdot\text{g}^{-1}$ ) | ( $\mu\text{mol}\cdot\text{g}^{-1}$ ) |                                  |
| MAPbBr <sub>3</sub> | 4.39931                               | 1.12604                               | 79.6%                            |
| MP0.05              | 12.92379                              | 1.34288                               | 90.5%                            |
| MP0.5               | 21.56695                              | 1.90779                               | 91.8%                            |
| MP1                 | 16.39412                              | 1.83628                               | 89.9%                            |
| MP2                 | 13.46413                              | 1.53441                               | 89.7%                            |
